# Supplementary material
Source: PubMed Central journal article supplement (PMC10797602)
Supplement: NIHMS1956226-supplement-Tables.pdf [file NIHMS1956226-supplement-Tables.pdf]

**Supplemental Table 1. Final Map of Qualitative Codes**

| Level 1 Codes                                                 | Level 2                                                                                                      | Level 3                                                                     | Level 4                         |
|---------------------------------------------------------------|--------------------------------------------------------------------------------------------------------------|-----------------------------------------------------------------------------|---------------------------------|
| Health care experiences                                       | Patient-Provider Communication, Preferences, Role of Provider in Enabling Patient Autonomy                   |                                                                             |                                 |
| Clinic Characteristics                                        | Environment, Pathways to Clinic                                                                              |                                                                             |                                 |
|                                                               | Satisfaction with clinic →                                                                                   | Distance, Responsiveness, Staff, Treatment Options                          |                                 |
| Treatment Characteristics and Satisfaction with Care Received | Communication, Front Desk Staff, Treatment, Responsive to Needs, Time with Provider(s)                       |                                                                             |                                 |
|                                                               | Areas of dissatisfaction →                                                                                   | Communication, Treatments, Time spent with providers, Unresponsive to needs |                                 |
| Health Care Discrimination                                    | Ethnicity, Race/color, Gender, Language/Accent, Sexual Orientation, Mental illness, social class             |                                                                             |                                 |
|                                                               | Not asked in Quantitative Survey →                                                                           | Disability, Religion, Weight, Mental Health                                 |                                 |
|                                                               | Personal Experience→                                                                                         | Action(s), Resolution                                                       |                                 |
|                                                               | Others' Experiences known to participant →                                                                   | Action(s), resolution                                                       |                                 |
|                                                               | Belief people of color are treated differently                                                               |                                                                             |                                 |
| Ideal Medical Provider                                        | Concordance with Current Provider                                                                            |                                                                             |                                 |
| Bad Provider                                                  |                                                                                                              |                                                                             |                                 |
| Treatment Options and Preferences                             | Pathways to preferred options                                                                                |                                                                             |                                 |
|                                                               | Preferences →                                                                                                | Experience-Based →                                                          | Medication, Talk Therapy, Other |
|                                                               |                                                                                                              | Hypothetical →                                                              | Medication, Talk Therapy, Other |
| Communicating Preferences to Providers                        | Comfort Level, Direct Communication, No Preferences Communicated, Past Experiences Communicating Preferences |                                                                             |                                 |
| Patient Agency                                                | Would/could change clinic under specific circumstances                                                       |                                                                             |                                 |
|                                                               | Agency limited by mental health diagnosis, race/ethnicity, social class, etc.                                |                                                                             |                                 |

**Supplemental Table 2: Interview Recruitment Targets and Number Informed via GfK Custom Research Group**

| <b>Sub-group</b>                           | <b>Number recruited</b> | <b>Number Informed</b> |
|--------------------------------------------|-------------------------|------------------------|
| <b><u>English speaking respondents</u></b> |                         |                        |
| <b>Non-Hispanic White</b>                  | 4                       | 250                    |
| <b>Non-Hispanic Black</b>                  |                         |                        |
| Reporting health care discrimination       | 2                       | 64                     |
| Not reporting health care discrimination   | 2                       | 142                    |
| <b>Hispanic</b>                            |                         |                        |
| Reporting health care discrimination       | 1                       | 42                     |
| Not reporting health care discrimination   | 1                       | 127                    |
|                                            |                         |                        |
| <b><u>Spanish Speaking Respondents</u></b> |                         |                        |
| Hispanic                                   |                         |                        |
| Reporting health care discrimination       | 1                       | 16                     |
| Not reporting health care discrimination   | 1                       | 65                     |

Notes: “Number informed” is based off of the potential number of respondents in each category based on the initial quantitative survey.

### Supplemental Table 3: Qualitative Interview Guide Questions

#### Treatment Options and Preferences

We are going to start by talking about the treatment you are currently getting for your depression care.

| Main Question                                                                                                                                                      | Probes                                                                                                                             |
|--------------------------------------------------------------------------------------------------------------------------------------------------------------------|------------------------------------------------------------------------------------------------------------------------------------|
| <b>What's most important to you when it comes to receiving care for depression?</b>                                                                                |                                                                                                                                    |
| <b>What are some things you like about the treatments you are currently getting or using for your depression?</b>                                                  | Examples: Medications, Talk therapy, multiple, alternative, other                                                                  |
| <b>Can you tell me how you came to like this about your treatment?</b>                                                                                             | Always had this treatment? Tried other treatments?<br><br>Can you tell me more about the reasons why you prefer this treatment(s)? |
| <b>What are some things you don't like about the treatments you are currently getting or using for your depression? What happened that made you not like this?</b> | Always had this treatment? Tried other treatments?                                                                                 |
| <b>How do you feel about what you are getting?</b>                                                                                                                 |                                                                                                                                    |

#### Preferences for Provider Attributes

For the next questions I want you to think about the providers that help you manage your depression. This could include your doctor, therapist, nutritionist, nurse, or anyone else who helps you.

| Main Question                                                                                                                                                            | Probes                                                                                                                                                                                                                                                                                                   |
|--------------------------------------------------------------------------------------------------------------------------------------------------------------------------|----------------------------------------------------------------------------------------------------------------------------------------------------------------------------------------------------------------------------------------------------------------------------------------------------------|
| <b>What comes to mind when you think about a “good medical provider”?</b>                                                                                                | What does he/she do that makes him/her a “good provider”?                                                                                                                                                                                                                                                |
| <b>What comes to mind when you think about “bad” provider?</b>                                                                                                           | What does he/she do that makes him/her a “bad provider”?                                                                                                                                                                                                                                                 |
| <b>What are some things that your current providers do that you like?</b>                                                                                                | <p>How satisfied are you with the amount of time you spend with your provider(s)?</p> <p>How satisfied are you with the way your provider communicates with you (e.g., uses words that are hard to understand)?</p> <p>To what extent your provider offers the care, tests, and treatments you need?</p> |
| <b>What are some things that your current providers do that you don’t like?</b>                                                                                          |                                                                                                                                                                                                                                                                                                          |
| <b>Using a scale from 0-10 where 0 is no match and 10 is a complete match, how would you rate the degree to which your provider matches the idea of “good provider”?</b> | <p>What would your provider have to do for the provider to be a 10.</p> <p>What would the provider have to do for the provider to be an 8.</p>                                                                                                                                                           |

### Clinical Experiences

Now, please think about the places you go to get care, like a clinic or doctor’s office for example.

| Main Question                                                                                                                                                        | Probes                                                                                                                                                                                |
|----------------------------------------------------------------------------------------------------------------------------------------------------------------------|---------------------------------------------------------------------------------------------------------------------------------------------------------------------------------------|
| <b>Why did you choose the clinic you current go to?</b>                                                                                                              |                                                                                                                                                                                       |
| <b>Using a scale from 0-10 where 0 is no match and 10 is a complete match, how would you rate the degree to which your clinic matches the idea of “good clinic”?</b> | <p>What would your clinic have to do for the clinic to be a 10.</p> <p>What would the clinic have to do for the clinic to be an 8.</p>                                                |
| <b>What are some things you like about the clinic or place you go to for your depression?</b>                                                                        | <p>Examples: distance, receptionists, atmosphere, cost, paperwork, wait times, insurance, lack of preferred treatment availability, culturally or linguistically appropriate care</p> |
| <b>What are some things you don’t like about this clinic or place you go to for your depression?</b>                                                                 | <p>How does a clinic meet/not meet your needs?</p>                                                                                                                                    |
| <b>To what extent do you get what you expect or want from the clinics you go to get care?</b>                                                                        |                                                                                                                                                                                       |
| <b>What are the things that you would like to get that you are not getting? What makes it harder for you to get those things that you want?</b>                      | <p>What if there was another clinic nearby that offered the things that you want? What would you do?</p> <p>What would you do if you don’t get what you wanted?</p>                   |

**Communicating Preferences and Patient Agency**

|                                                                                    |  |
|------------------------------------------------------------------------------------|--|
| <b>To what extent do you feel like you get what you want from your treatment?</b>  |  |
| <b>How do you communicate to your doctor, nurse, or other provider about that?</b> |  |

|                                                                                                    |                                                                                                |
|----------------------------------------------------------------------------------------------------|------------------------------------------------------------------------------------------------|
|                                                                                                    |                                                                                                |
| <b>What would happen if your provider or clinic stopped offering this treatment that you like?</b> | What if there was another clinic nearby that offered a different treatment, what would you do? |

### Discrimination Experiences in Health Care

**[If interviewee reported in the survey personal experiences of discrimination]:** You mentioned in the survey that you have been treated unfairly by a medical provider or front desk staff because of your *[reason listed]*. I am very sorry that this happened, but would like to learn more about these experiences to help other people. Do you mind sharing that experience with me?

| <b>Main Question</b>                                                                                                                                                                                                                                                                                                                           | <b>Probes</b>                                                                                                                                                                                                   |
|------------------------------------------------------------------------------------------------------------------------------------------------------------------------------------------------------------------------------------------------------------------------------------------------------------------------------------------------|-----------------------------------------------------------------------------------------------------------------------------------------------------------------------------------------------------------------|
| <b>Think back to when this happened to you.</b>                                                                                                                                                                                                                                                                                                | <p>What did you do? (e.g., reported event, talked to provider)</p> <p>What measures were taken to address the issue?</p> <p>How has that incident changed the way you feel about receiving treatment there?</p> |
| <b>[If interviewee reported that someone close to him/her experienced discrimination]: You mentioned in the survey that someone close to you has been treated unfairly by a medical provider or front desk staff because of their <i>[reason listed]</i>. I am very sorry that this happened. Do you mind sharing that experience with me?</b> |                                                                                                                                                                                                                 |

**[If interviewee reported neither of the above but reported feeling that discrimination was a problem]:  
You mentioned in the survey that you believe people of color are not always treated the same. Can you tell me more about that?**

### **Open-Ended Conclusion**

Thank you so much for taking the time to share your experiences with me so thoroughly. Your experiences are incredibly valuable to our research, and we appreciate your time.

Is there anything else you would like to tell me about anything we talked about today?
